# Supplementary material for: Reline-assisted synthesis of fcc-hcp Ni/Ni(OH) 2 nanocatalyst for effective reductive hydrogenation of 4-nitrophenol
Source: Royal Society of Chemistry journal article supplement (doi:10.1039/d5ma01275a), 2026-01-01
Supplement: d5ma01275a1.pdf [file d5ma01275a1.pdf]

**Electronic Supporting Information (ESI)**

**Reline-assisted synthesis of fcc-hcp Ni/Ni(OH)<sub>2</sub> nanocatalyst for effective reductive  
hydrogenation of 4-nitrophenol**

Md. Minhajul Alam Khan<sup>1</sup>, Shawon Saha<sup>1</sup>, Sumaya Nur Mithila<sup>1</sup>, Yeasin A. Tarek<sup>2</sup>, Akter  
Hossain Reaz<sup>3</sup>, Shakhawat H. Firoz<sup>1\*</sup>

<sup>1</sup>Department of Chemistry, Bangladesh University of Engineering and Technology (BUET),  
Dhaka-1000, Bangladesh

<sup>2</sup>School of Mechanical and Mining Engineering, The University of Queensland, St Lucia,  
Queensland 4072

<sup>3</sup>Department of Chemistry, Michigan State University, East Lansing, MI 48824, USA

Corresponding Author

Shakhawat H. Firoz ([shfiroz@chem.buet.ac.bd](mailto:shfiroz@chem.buet.ac.bd))

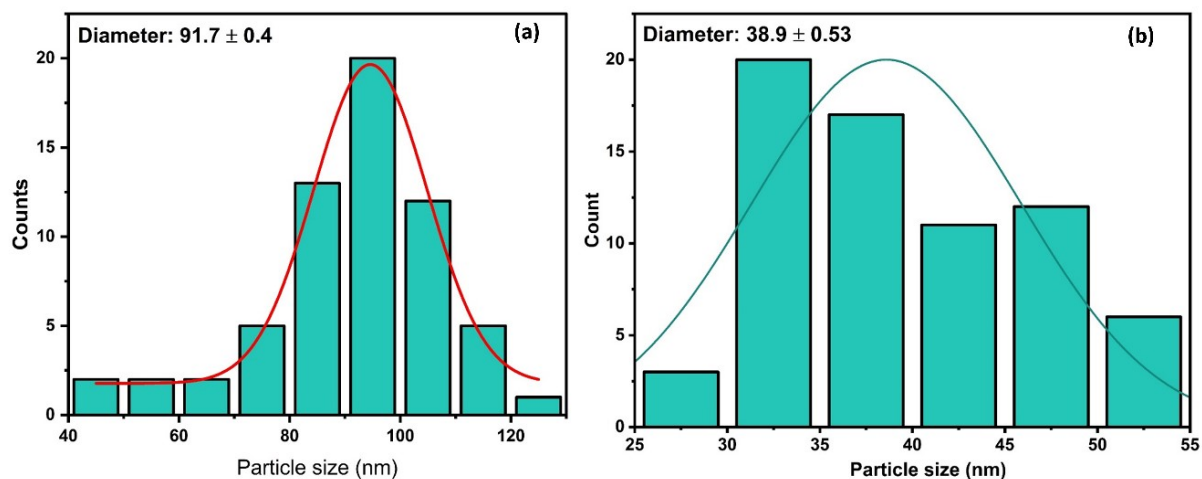

Fig. S1. Average particle size histogram (a) Ni-aq. and (b) Ni-reline

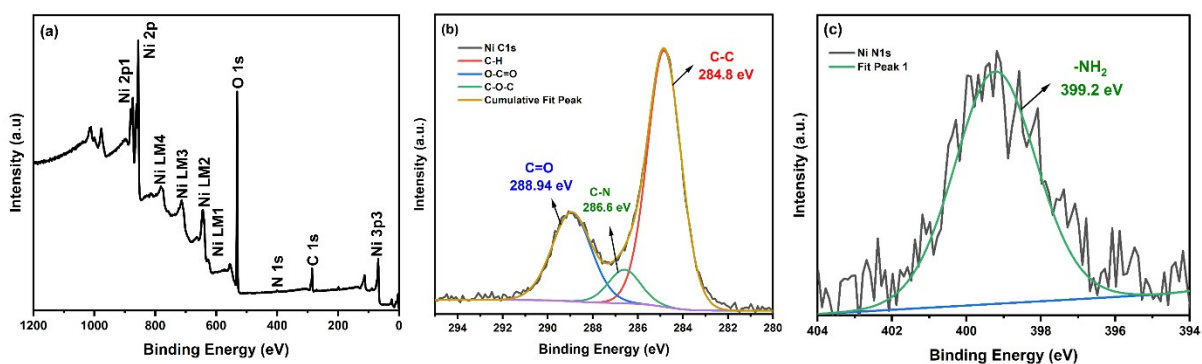

Fig. S2. Survey XPS spectrum of Ni-reline, (b) C 1s XPS spectrum and (c) N 1s XPS spectrum.

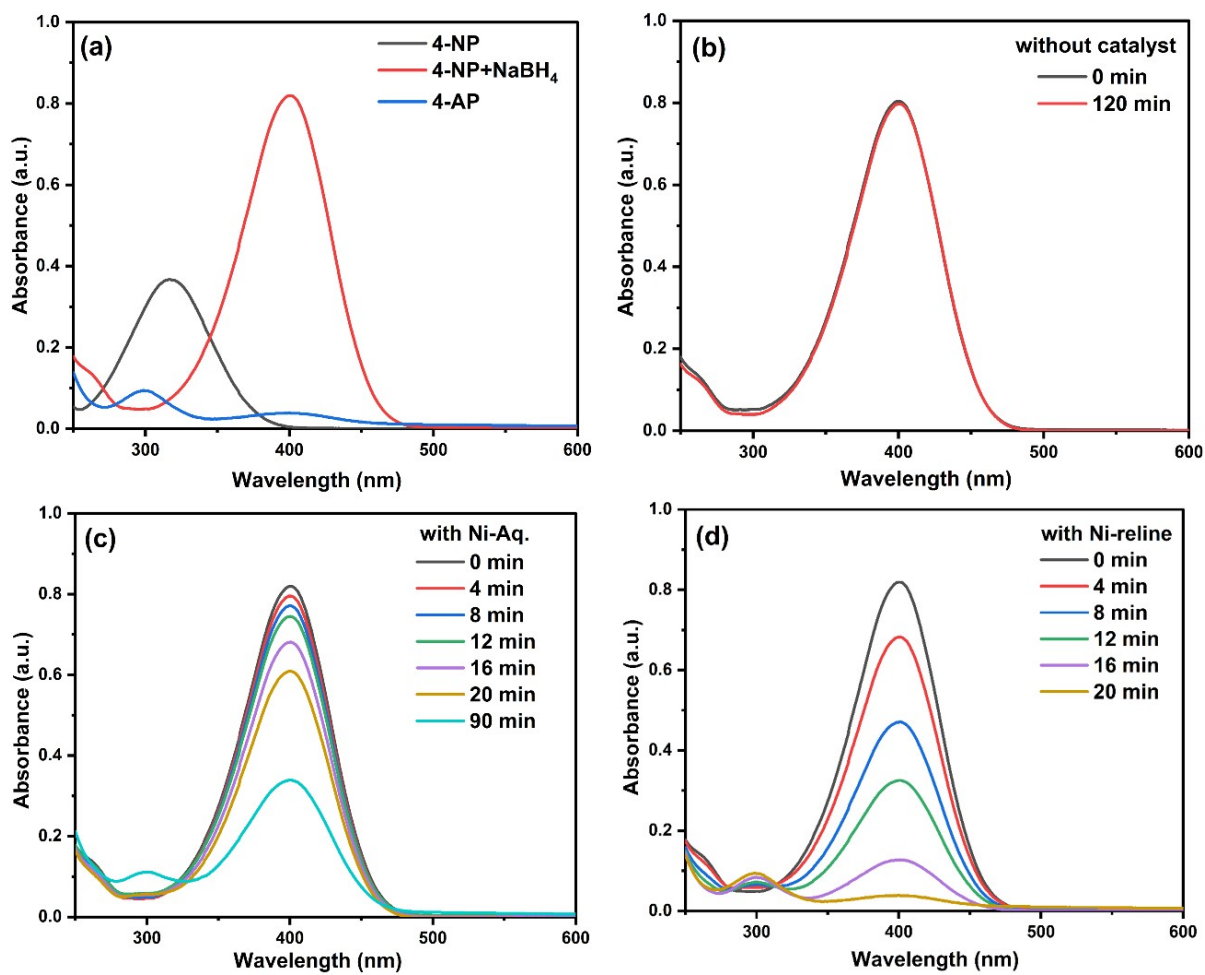

25

26 Fig. S3. UV-Vis absorption spectra of (a) 4-NP, 4-NP+NaBH<sub>4</sub>, 4-AP (b) hydrogenation of 4-NP  
 27 without catalyst (c-d) catalytic hydrogenation of 4-NP with Ni-Aq. and Ni-reline.

28

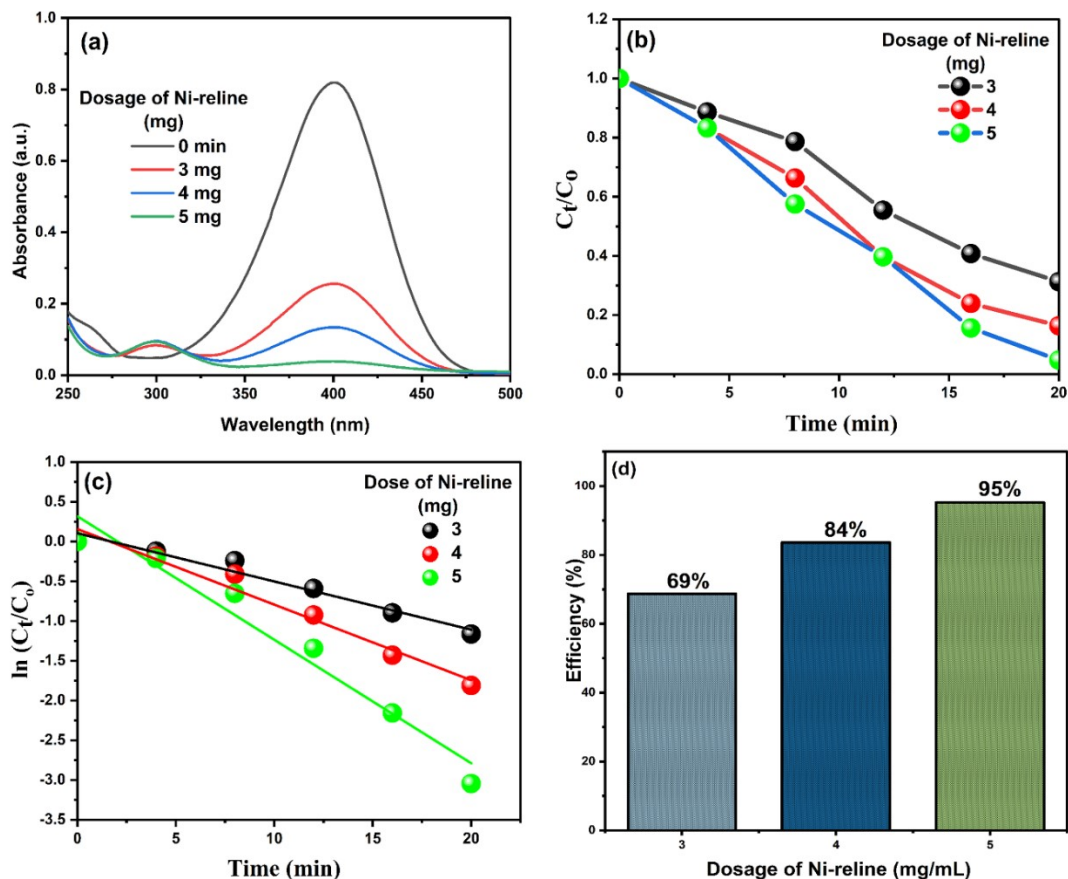

29

30 Fig. S4. Comparative analysis of (a) Time-dependent UV-vis spectral changes of the catalytic  
 31 hydrogenation of 4-NP to 4-AP using NaBH<sub>4</sub> at different amounts of Ni-reline (b)  $C_t/C_0$  vs time  
 32 (c) Efficiency after 20 minutes.

33

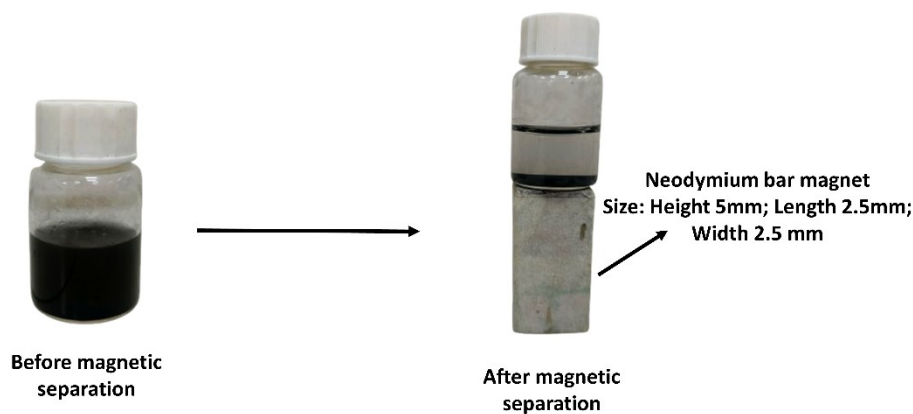

34

35 Fig. S5. Magnetic separation of Ni/Ni(OH)<sub>2</sub> nanocomposite.

36

37 Table S1. Chemical composition in Atomic % of the Ni-reline derived from XPS analysis

| Sample    | Atomic % of each element |       |       |      |
|-----------|--------------------------|-------|-------|------|
|           | Ni                       | C     | O     | N    |
| Ni-reline | 23.56                    | 20.44 | 53.98 | 2.02 |

38

39 Table S2. A summary of the correlation coefficient of  $\ln (C_t/ C_0)$  vs. time plot, rate constant, and  
40 activity parameter for the reduction of 4-NP of the synthesized nanocatalysts

| Catalyst  | $k$ ( $\text{min}^{-1}$ ) | $R^2$ | Efficiency (%) |
|-----------|---------------------------|-------|----------------|
| Ni-Aq.    | 0.0121                    | 0.94  | 26             |
| Ni-reline | 0.1336                    | 0.97  | 95             |

41

42 Table S3. Summary of the correlation coefficient of  $\ln (C_t/ C_0)$  vs. time plot, rate constant, and  
43 activity parameter for reducing 4-NP of different dose of Ni-reline

| Dose of catalyst (mg) | $k$ ( $\text{min}^{-1}$ ) | $R^2$ | Efficiency (%) |
|-----------------------|---------------------------|-------|----------------|
| 3                     | 0.0607                    | 0.96  | 69             |
| 4                     | 0.0901                    | 0.97  | 84             |
| 5                     | 0.1559                    | 0.96  | 95             |

44

45 Table S4. Summary of the catalytic performance of Ni-reline at various pH within fixed time  
46 duration

| Time | Efficiency (%) |      |      |      |       |
|------|----------------|------|------|------|-------|
|      | pH 3           | pH 5 | pH 7 | pH 9 | pH 11 |
| 0    | 0              | 0    | 0    | 0    | 0     |
| 4    | 57.9           | 42.5 | 20.9 | 16.5 | 1.3   |
| 8    | 84.9           | 76.1 | 42.5 | 21.4 | 1.7   |

|           |      |      |      |      |     |
|-----------|------|------|------|------|-----|
| <b>12</b> | 96.7 | 90   | 62.5 | 27.8 | 2.2 |
| <b>16</b> | 98   | 96.9 | 84.4 | 35.3 | 3.7 |
| <b>20</b> | 98.2 | 97.8 | 95.2 | 41.9 | 4.0 |

47
